# Supplementary material
Source: publisher figshare collection journal article supplement (https://acs.figshare.com/ndownloader/files/3797536)
Supplement: Supplementary file 1 [file 3797536]

## Supporting Information

### Highly efficient photoelectrochemical hydrogen generation using $\text{Zn}_x\text{Bi}_2\text{S}_{3+x}$ sensitized platelike $\text{WO}_3$ photoelectrodes

Canjun Liu <sup>a</sup>, Yanghui Yang <sup>b</sup>, Wenzhang Li <sup>a,\*</sup>, Jie Li <sup>a,\*</sup>, Yaomin Li <sup>c</sup>, Qilin Shi <sup>a</sup>  
Qiyuan Chen <sup>a</sup>

<sup>a</sup> School of Chemistry and Chemical Engineering, Central South University, Changsha  
410083 China

<sup>b</sup> College of Resources and Environment, Hunan Agricultural University, Changsha  
410128, China

<sup>c</sup> Department of Chemistry, University College London, 20 Gordon Street, London,  
WC1H 0AJ, UK

\*Corresponding author. Tel.: +86 731 8887 9616; fax: +86 731 8887 9616.  
E-mail addresses: liwenzhang@csu.edu.cn, [yangyahui2002@sina.com.cn](mailto:yangyahui2002@sina.com.cn)

### Supplementary methods

The crystalline phase of the electrodes was characterized by X-ray powder diffraction (XRD, D/Max2250, Rigaku Corporation, Japan). The local composition of  $\text{Zn}_x\text{Bi}_2\text{S}_{3+x}/\text{WO}_3$  film was analyzed by an area scan of energy dispersive X-ray spectrometer (EDS) using scanning electron microscopy (SEM) and X-ray photoelectron spectroscopy (XPS). Raman spectra of the pure  $\text{Bi}_2\text{S}_3$  and  $\text{Zn}_x\text{Bi}_2\text{S}_{3+x}$  films were recorded with a LabRAM HR800 Raman analyzer using an excitation laser source of 532 nm wavelength. The pure  $\text{Bi}_2\text{S}_3$  and  $\text{Zn}_x\text{Bi}_2\text{S}_{3+x}$  films were prepared on

the FTO by a same SILAR method and the dipping procedure was repeated 30 times. Photocurrent-time plot of the photoelectrodes was obtained at -0.1 V vs. Ag/AgCl under continuous illumination. The Mott–Schottky plots of the photoelectrodes were measured by the electrochemical analyzer at the AC frequency of 1 kHz.

## Supplementary data

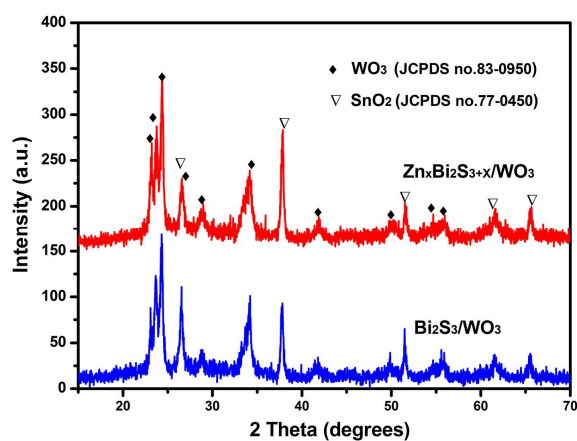

**Figure S1.** XRD patterns of  $\text{Bi}_2\text{S}_3/\text{WO}_3$  film and  $\text{Zn}_x\text{Bi}_2\text{S}_{3+x}/\text{WO}_3$  film

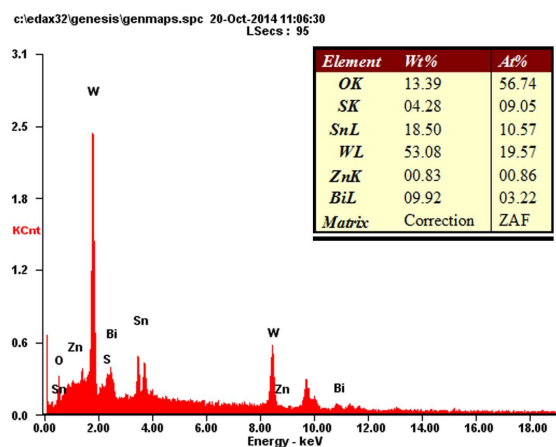

**Figure S2.** EDS spectra of  $\text{Zn}_x\text{Bi}_2\text{S}_{3+x}/\text{WO}_3$  film.

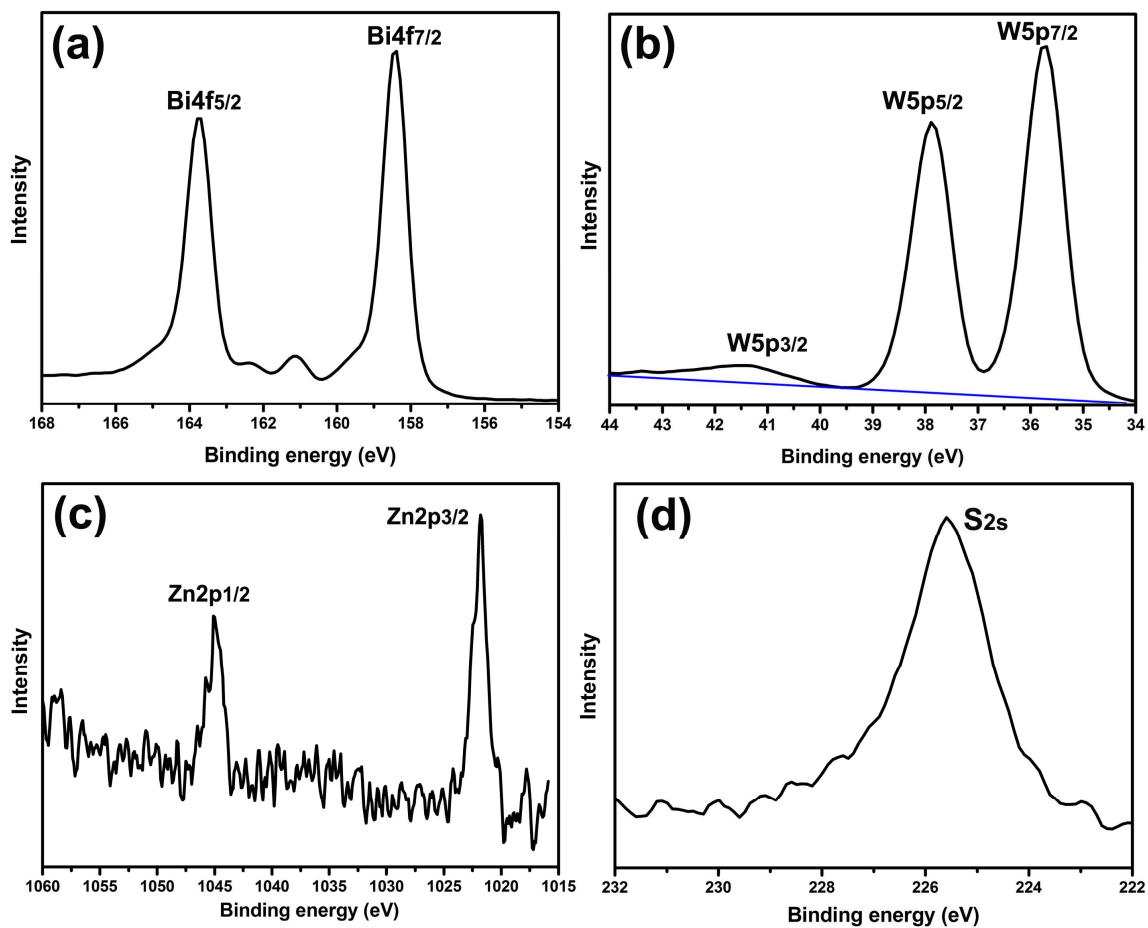

**Figure S3** XPS spectra for Bi (a), W (b), Zn (c), S (d) of the  $\text{Zn}_x\text{Bi}_2\text{S}_{3+x}/\text{WO}_3$  film

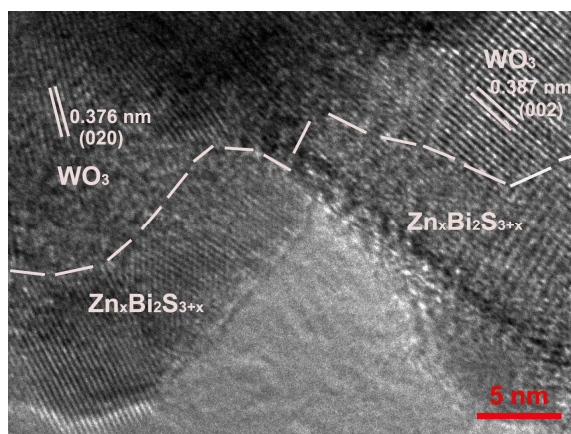

**Figure S4.** HRTEM images of  $\text{Zn}_x\text{Bi}_2\text{S}_{3+x}/\text{WO}_3$  plate

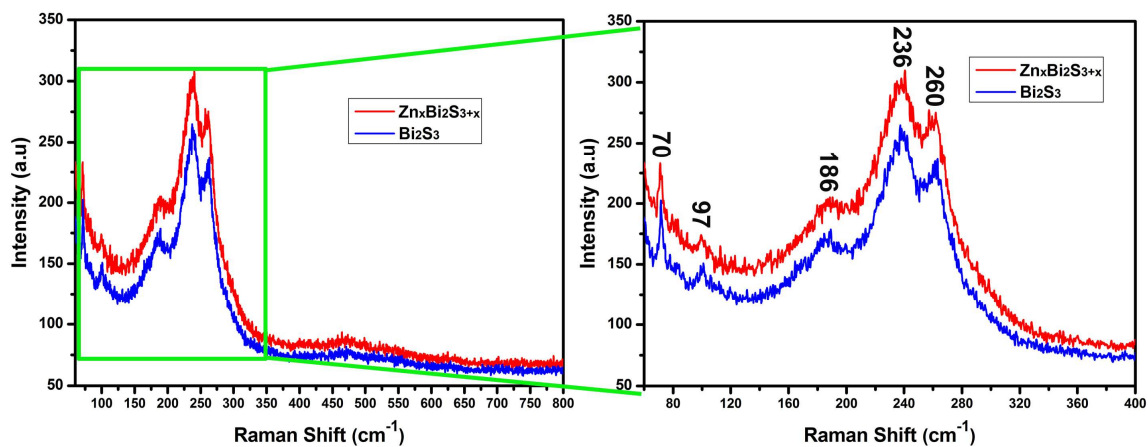

**Figure S5.** Raman spectrum of pure  $\text{Bi}_2\text{S}_3$  and  $\text{Zn}_x\text{Bi}_2\text{S}_{3+x}$  film on the FTO substrates

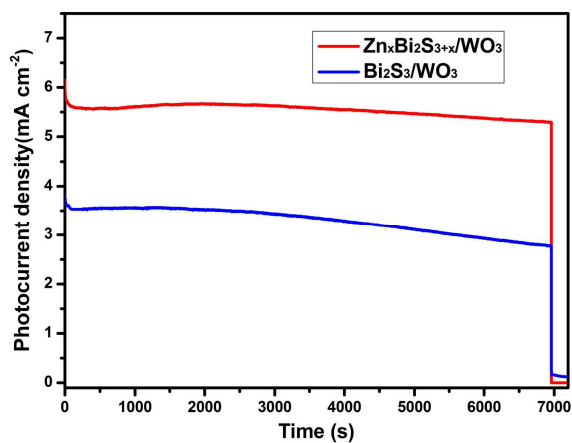

**Figure S6.** Photocurrent-time plot of the photoelectrodes at -0.1 V vs Ag/AgCl.

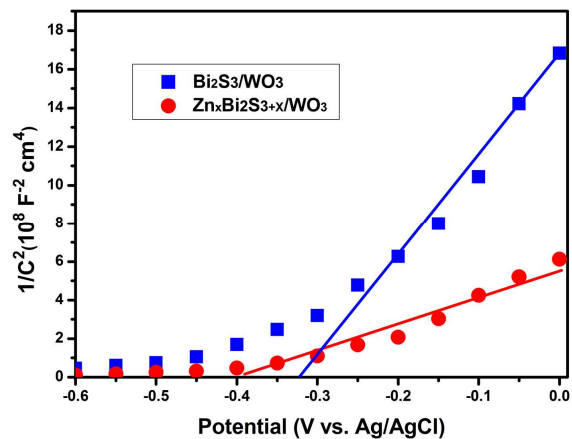

**Figure S7.** Mott-Schottky plots of the photoelectrodes
